# Supplementary material for: Porous boron nitride coupled with CdS for adsorption–photocatalytic synergistic removal of RhB
Source: Royal Society of Chemistry journal article supplement (doi:10.1039/c6ra20671a), 2016-01-01
Supplement: c6ra20671a1.pdf [file c6ra20671a1.pdf]

## Electronic supplementary information

### Porous boron nitride coupled with CdS for adsorption-photocatalytic synergistic removal of RhB

Xiaopeng Li<sup>a</sup>, Feng Qi<sup>a</sup>, Yanming Xue<sup>b</sup>, Chao Yu<sup>a</sup>, Huichao Jia<sup>a</sup>, Yinghao Bai<sup>a</sup>, Sai Wang<sup>a</sup>, Zhenya Liu<sup>a</sup>, Jun Zhang<sup>\*a</sup> and Chengchun Tang<sup>\*a</sup>

<sup>a</sup>*School of Material Science and Engineering and Hebei Key Laboratory of Boron Nitride Micro and Nano Materials, Hebei University of Technology, Tianjin 300130, P. R. China*

<sup>b</sup>*World Premier International Center for Materials Nanoarchitectonics (WPI-MANA), National Institute for Materials Science (NIMS), Namiki 1-1, Tsukuba, Ibaraki 305-0044, Japan*

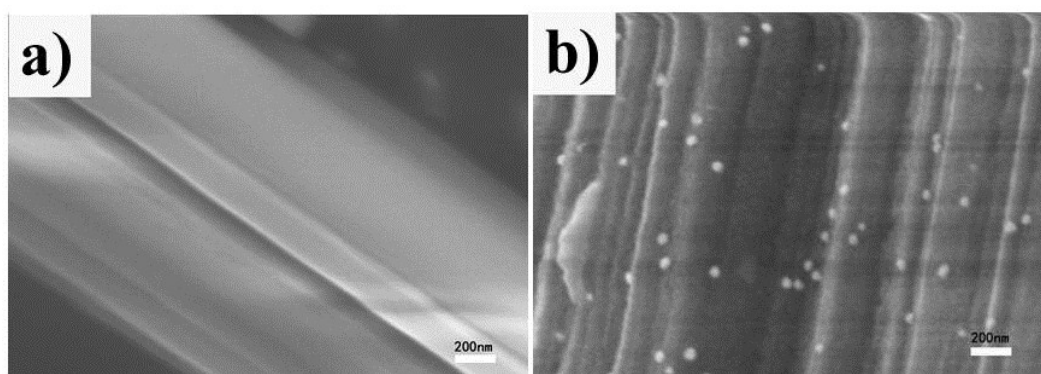

**Figure S1.** High magnification SEM images of a) pure BN, and b) 0.5 % a-BN/CdS.

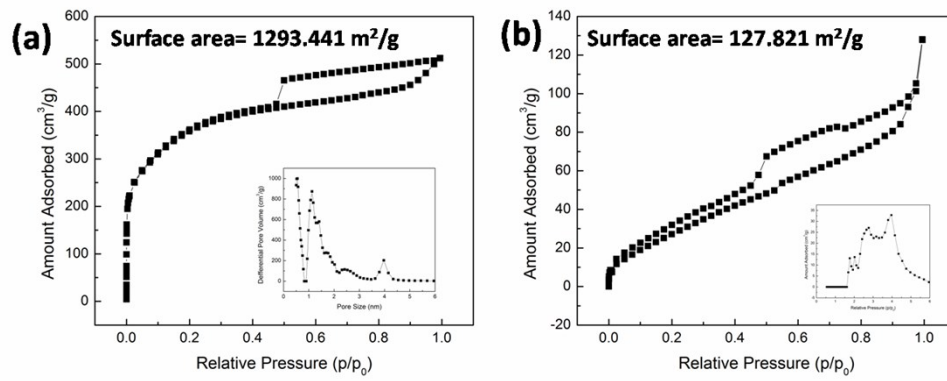

**Figure S2.** Nitrogen adsorption/desorption isotherms of a) pure active BN and b) 0.5 % a-BN/CdS (inset showing the corresponding pore size distributions obtained by the DFT method).

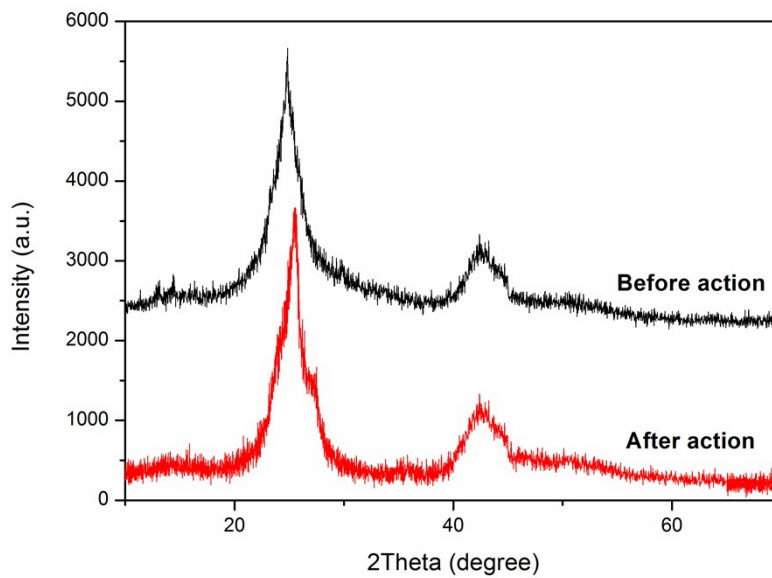

**Figure S3.** XRD patterns of 0.5 % a-BN/CdS a) before and b) after 5 times photocatalytic reaction.
